# Supplementary material for: CRISPR/Cas12a-based approaches for efficient and accurate detection of Phytophthora ramorum
Source: Front Cell Infect Microbiol. 2023 Jun 27;13:1218105. doi: 10.3389/fcimb.2023.1218105 (PMC10333691; doi:10.3389/fcimb.2023.1218105)
Supplement: Supplementary file 2 [file Table_1.xlsx]

## Sheet: Sheet1
Table S1 CrRNA and ssDNA rpoter concentration screening for the RPA-CRISPR/Cas12a assay system for Phytophthora ramorum
Number	Concentration of CrRNA	Concentration of ssDNA repoter
1	40 nM	40 nM
2	300 nM	40 nM
3	500 nM	300 nM
4	1 µM	1 µM
5	1 µM	2 µM
6	2 µM	1 µM
7	5 µM	1 µM
8	1 µM	5 µM
9	10 µM	5 µM
10	10 µM	10 µM
