# Supplementary material for: CRISPR/Cas12a-based approaches for efficient and accurate detection of Phytophthora ramorum
Source: Front Cell Infect Microbiol. 2023 Jun 27;13:1218105. doi: 10.3389/fcimb.2023.1218105 (PMC10333691; doi:10.3389/fcimb.2023.1218105)
Supplement: Supplementary file 3 [file Table_2.xlsx]

## Sheet: Sheet1
Table S2. Cost comparison of RPA-LFD and RPA-CRISPR/Cas12a assay
Reaction	Product number	Price（RMB）	Packaging specification reaction/box	Price/Tube（RMB）
RPA-LFD	DNA-LS03	1610	48	34
	TEC-LS04	1200	48	25
RPA-CRISPR/Cas12a	DNA-LS03	1080	50	22
