# Supplementary material for: CRISPR/Cas12a-based approaches for efficient and accurate detection of Phytophthora ramorum
Source: Front Cell Infect Microbiol. 2023 Jun 27;13:1218105. doi: 10.3389/fcimb.2023.1218105 (PMC10333691; doi:10.3389/fcimb.2023.1218105)
Supplement: Supplementary file 4 [file Table_3.xlsx]

## Sheet: Sheet1
Fluorescence values measured by RPA-CRISPR/Cas12a assay for detection of Phytophthora ramorum
Fluorescence values optimized for crRNA and ssDNA reporter gene concentrations determined by RPA-CRISPR/Cas12a
	1	NC	2	NC	3	NC	4	NC	5	NC	6	NC	7	NC	8	NC	9	NC	10	NC
Number 1	23.6	10.98	28.9	18.9	273.6	14.89	182.5	22.1	279.3	19.88	119	27.65	110.5	17.69	708.9	21.67	831.8	19.63	6538.33	19.41
Number 2	20.66	18.47	26.9	27.42	264.1	23.74	170.11	17.56	250.9	12.5	98	21.33	101.2	18.98	688.9	19.5	819.4	20.11	6425.83	14.77
Number 3	24.1	21.15	28.1	28.42	259.8	31.67	192.3	24.3	291.2	23.44	131	20.55	121	21.87	722.7	17.14	845.5	24.98	6651.83	21.55
Average	22.7867	16.8667	27.9667	24.9133	265.833	23.4333	181.637	21.32	273.8	18.6067	116	23.1767	110.9	19.5133	706.833	19.4367	832.233	21.5733	6538.67	18.5767
STEDVP	1.51757	4.30389	0.821922	4.27162	5.76561	6.85384	9.07958	2.80633	16.9058	4.55609	13.6382	3.17911	8.08826	1.74765	13.876	1.84991	10.6597	2.41683	92.2644	2.82995
P-value	>0.9999		>0.9999		<0.0001		<0.0001		<0.0001		0.0155		0.0185		<0.0001		<0.0001		<0.0001
Fluorescence values optimized for the recombinase polymerase amplification (RPA) reaction time
	1	2	3	4	5	6	7	NC
Number 1	38.65	925.8	982.3	3891	5060	2980.9	4519	16.7
Number 2	30.2	899.3	966.9	3787	5023	3821.1	4311	14.2
Number 3	45.77	945.2	1002	3981	5202.9	4911.2	4611.5	17.2
Average	38.2067	923.433	983.733	3886.33	5095.3	3904.4	4480.5	16.0333
STEDVP	6.36415	18.8132	14.3653	79.2689	77.5696	790.24	125.663	1.31233
P-value	>0.9999	<0.0001	<0.0001	<0.0001	<0.0001	0.0022	<0.0001
Fluorescence values optimized for the Cas12a cleavage time
	1	NC	2	NC	3	NC	4	NC	5	NC	6	NC	7	NC	8	NC
Number 1	1898	12.99	2292	17.83	2378	22.65	3795	12.35	5560	17.47	5375	10.23	5131	11.59	6765	16.59
Number 2	1792.4	17.96	2163.3	14.56	2199	20.67	3667	18.9	5449	10.2	5250	14.22	4997	20.34	6590	13.98
Number 3	2015.3	16.67	2385.3	18.77	2453	14.8	3928	16.59	5698	23.4	5622	15.63	5311	19.17	6923	24.6
Average	1901.9	15.8733	2280.2	17.0533	2343.33	19.3733	3796.67	15.9467	5569	17.0233	5415.67	13.36	5146.33	17.0333	6759.33	18.39
STEDVP	91.0403	2.10574	91.0144	1.80433	106.553	3.33333	106.559	2.71244	101.853	5.39813	154.567	2.28688	128.648	3.87854	136.006	4.51856
P-value	<0.0001		<0.0001		<0.0001		<0.0001		<0.0001		<0.0001		<0.0001		<0.0001
Fluorescence values for the evaluation of the specificity of Genus
	1	2	3	4	5	6	7	NC
Number 1	5414	25.06	24.38	28.16	31.57	23.12	22.1	15.75
Number 2	5316	28.16	20.28	20.78	29.59	26.87	17.97	22.19
Number 3	5549	20.11	26.44	16.58	30.06	20.03	24.39	18.74
Average	5426.33	24.4433	23.7	21.84	30.4067	23.34	21.4867	18.8933
STEDVP	95.5208	3.3152	2.56036	4.78656	0.844683	2.79675	2.65659	2.63135
P-value	<0.0001	>0.9999	>0.9999	>0.9999	>0.9999	>0.9999	>0.9999
Fluorescence values for the evaluation of the specificity of Species
	1	2	3	4	5	6	7	NC
Number 1	4919	19.4	24.65	28.33	29.04	23.51	21.95	15.65
Number 2	5094	15.86	25.85	23.65	33.85	20.54	15.86	13.03
Number 3	5133	21.81	24.06	27.06	24.65	25.35	24.65	20.11
Average	5048.67	19.0233	24.8533	26.3467	29.18	23.1333	20.82	16.2633
STEDVP	93.0603	2.44364	0.744774	1.97606	3.75719	1.98165	3.67638	2.92275
P-value	<0.0001	>0.9999	>0.9999	>0.9999	>0.9999	>0.9999	>0.9999
Fluorescence values for the evaluation of the sensitivity of sensitivity of the RPA-CRISPR/Cas12a assay for detection of Phytophthora ramorum
	1	2	3	4	5	6	7	NC
Number 1	5095.4	3029	1709.6	1494.1	289.1	285.2	265.9	14.99
Number 2	5288	2972	1682.9	1323.7	266.9	276.6	245.3	18.79
Number 3	5319	3114	1907.4	1512.4	291.5	291.4	299.8	25.61
Average	5234.13	3038.33	1766.63	1443.4	282.5	284.4	270.333	19.7967
STEDVP	98.9123	58.3457	100.132	84.9698	11.0743	6.0685	22.4693	4.39364
P-value	<0.0001	<0.0001	<0.0001	<0.0001	0.0113	0.0106	0.0106
Fluorescence values for the detection of Phytophthora ramorum in naturally infected soybean root samples using the RPA-CRISPR/Cas12a assay
	1	2	3	4	5	NC
Number 1	5068	19.88	996.4	3006	4663	20.4
Number 2	5302	22.6	966.7	3119	4599	16.89
Number 3	5198	17.19	1158.1	2988	4832	25.7
Average	5189.33	19.89	1040.4	3037.67	4698	20.9967
STEDVP	95.7265	2.20863	84.1051	57.9789	98.2887	3.62133
P-value	<0.0001	>0.9999	<0.0001	<0.0001	<0.0001
